# Supplementary material for: Beyond efficacy in water containers: Temephos and household entomological indices in six studies between 2005 and 2013 in Managua, Nicaragua
Source: PubMed Central journal article supplement (PMC5506593; doi:10.1186/s12889-017-4296-6), 2017-05-30
Supplement: 12889_2017_4296_MOESM1_ESM.pdf [file 12889_2017_4296_MOESM1_ESM.pdf]

Table S1. Households with any larvae or pupae positive containers (Household index) and temephos presence and timing of application in four surveys in Managua control sites between 2006 and 2013

| Survey date | Temephos present <i>and</i> temephos visit within the last 30 days |                                  | No temephos present, or temephos visit more than 30 days ago, or no visit |                                  | OR (95% CI)*            |
|-------------|--------------------------------------------------------------------|----------------------------------|---------------------------------------------------------------------------|----------------------------------|-------------------------|
|             | No. inspected households                                           | No. (%) with positive containers | No. inspected households                                                  | No. (%) with positive containers |                         |
| Oct 2006    | 549                                                                | 140 (25)                         | 2,085                                                                     | 461 (22)                         | 1.07 (0.84-1.35)        |
| Oct 2007    | 579                                                                | 125 (22)                         | 2,965                                                                     | 690 (23)                         | 0.80 (0.64-1.01)        |
| Aug 2012    | 1,034                                                              | 379 (37)                         | 1,049                                                                     | 421 (40)                         | 1.06 (0.87-1.30)        |
| Jan 2013    | 599                                                                | 161 (27)                         | 3,072                                                                     | 641 (21)                         | <b>1.35 (1.09-1.67)</b> |

\* Odds ratio and 95% confidence intervals from GLMM, with cluster as random effect.

OR of >1.0 indicates that households with temephos present and applied within last 30 days were *more* likely to have a positive entomological indicator; bold font indicates the association was significant at the 5% level

Table S2. Pupae-positive households and temephos presence and timing of application in four surveys in Managua control sites between 2006 and 2013

| Survey date | Temephos present <i>and</i> temephos visit within the last 30 days |                    | No temephos present, or temephos visit more than 30 days ago, or no visit |                    | OR (95% CI)*     |
|-------------|--------------------------------------------------------------------|--------------------|---------------------------------------------------------------------------|--------------------|------------------|
|             | No. inspected households                                           | No. (%) with pupae | No. inspected households                                                  | No. (%) with pupae |                  |
| Oct 2006    | 549                                                                | 59 (11)            | 2,085                                                                     | 205 (10)           | 1.18 (0.85-1.63) |
| Oct 2007    | 579                                                                | 71 (12)            | 2,965                                                                     | 373 (13)           | 0.92 (0.69-1.23) |
| Aug 2012    | 1,034                                                              | 185 (18)           | 1,049                                                                     | 245 (23)           | 0.87 (0.70-1.11) |
| Jan 2013    | 599                                                                | 68 (11)            | 3,072                                                                     | 280 (9)            | 1.32 (0.98-1.77) |

\* Odds ratio and 95% confidence intervals from GLMM, with cluster as random effect.

OR of >1.0 indicates that households with temephos present and applied within the last 30 days were *more* likely to have a positive entomological indicator; bold font indicates the association was significant at the 5% level

Table S3. Number of people, number of pupae, and temephos presence and timing of application in four surveys in Managua control sites between 2006 and 2013

| Survey date | Temephos observed in any container |            |                 | Temephos not observed in any container |            |                 | OR (95% CI)*            |
|-------------|------------------------------------|------------|-----------------|----------------------------------------|------------|-----------------|-------------------------|
|             | No. households                     | No. people | No. pupae (PPP) | No. households                         | No. people | No. pupae (PPP) |                         |
| Oct 2006    | 549                                | 3,207      | 881 (0.3)       | 2,085                                  | 12,343     | 2,425 (0.2)     | 1.21 (0.84-1.74)        |
| Oct 2007    | 579                                | 3,292      | 773 (0.2)       | 2,965                                  | 17,160     | 5,232 (0.3)     | 0.74 (0.51-1.05)        |
| Aug 2012    | 1,034                              | 5,449      | 1,790 (0.3)     | 1,049                                  | 5,375      | 2,351 (0.4)     | 0.83 (0.63-1.09)        |
| Jan 2013    | 599                                | 3,200      | 672 (0.2)       | 3,072                                  | 15,924     | 1,985 (0.1)     | <b>1.50 (1.10-2.06)</b> |

\* Odds ratio and 95% confidence intervals from GLMM, with cluster as random effect.

We dichotomised the pupae per person (PPP) variable into households with above and below the mean PPP.

OR of >1.0 indicates that households with temephos present and applied within the last 30 days were *more* likely to have a positive entomological indicator; bold font indicates the association was significant at the 5% level
